# Supplementary material
Source: PubMed Central journal article supplement (PMC1458627)

**A****NSE-apoE Mice**

E3 E4 E3 E4

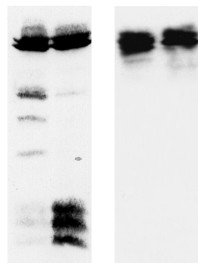

Anti-Full-length ApoE

Anti-C-terminal ApoE

**B****GFAP-apoE Mice**

E3 E4 E4

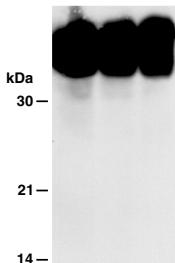

Anti-Full-length ApoE

**C****Humans**Control AD Control AD  
E3/3 E4/3 E3/3 E4/3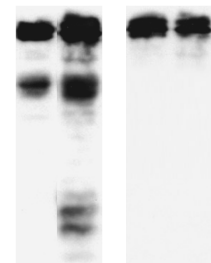

Anti-Full-length ApoE

Anti-C-terminal ApoE

**D****Mouse Brain Lysate**E4- E4-  
Thr-Ala-  
E4 E3 61 255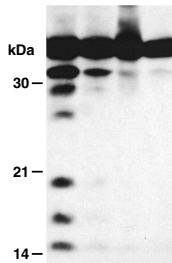

Supplement: pnas_0600549103_1.pdf [file pnas_0600549103_1.pdf]
