# Supplementary material
Source: PubMed Central journal article supplement (PMC1458627)

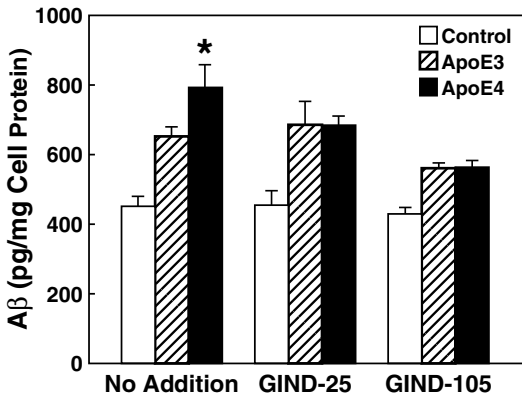

Supplement: pnas_0600549103_2.pdf [file pnas_0600549103_2.pdf]
